# Supplementary material
Source: PubMed Central journal article supplement (PMC4686367)
Supplement: 10-1055-s-0035-1558183-sup_gf969.pdf [file 10-1055-s-0035-1558183-sup_gf969.pdf]

# Embryonenerhaltende Gewinnung pluripotenter Stammzellen: Implikationen für die regenerative Medizin und die Reproduktionsmedizin

## Non-embryo-destructive Extraction of Pluripotent Embryonic Stem Cells: Implications for Regenerative Medicine and Reproductive Medicine

### Autoren

R. Dittrich<sup>1</sup>, M. W. Beckmann<sup>1</sup>, W. Würfel<sup>2</sup>

### Institute

<sup>1</sup> Frauenklinik des Universitätsklinikums Erlangen, Friedrich-Alexander Universität Erlangen-Nürnberg, Erlangen  
<sup>2</sup> Kinderwunsch-Centrum München, München

### Schlüsselwörter

- Stammzellgewinnung
- embryonenerhaltend
- Präimplantationsdiagnostik (PID)
- Präimplantationstherapie (PIT)

### Key words

- stem cell extraction
- embryo-preserving
- preimplantation genetic diagnosis (PGD)
- preimplantation therapy (PIT)

**eingereicht** 2.6.2015  
**revidiert** 12.8.2015  
**akzeptiert** 20.8.2015

### Bibliografie

**DOI** <http://dx.doi.org/10.1055/s-0035-1558183>  
 Geburtsh Frauenheilk 2015; 75: 1–5 © Georg Thieme Verlag KG  
 Stuttgart · New York ·  
 ISSN 0016-5751

### Korrespondenzadresse

**Prof. Dr. rer. nat. Ralf Dittrich**  
 Professur für exp.  
 Reproduktionsmedizin  
 Frauenklinik  
 Universitätsklinikum Erlangen  
 Universität Erlangen-Nürnberg  
 Universitätsstraße 21–23  
 91054 Erlangen  
[ralf.dittrich@uk-erlangen.de](mailto:ralf.dittrich@uk-erlangen.de)

### Zusammenfassung

Am 1. August 2013 wurde vom Deutschen Patent- und Markenamt das Patent für die Patentschrift „Embryonenerhaltende Gewinnung pluripotenter embryonaler Stammzellen, derart gewonnene Stammzellen und Verwendung derselben“ (DE 10 2004 062 184 B4) erteilt. Das vorliegende Patent beschreibt ein Verfahren zur embryonenerhaltenden Gewinnung embryonaler Stammzellen aus der inneren Zellmasse (ICM) im Entwicklungsstadium der Blastozyste. Es wurde am 23.12.2004 beim Deutschen Patentamt in München angemeldet und 2006 als Patentanspruch offengelegt, also veröffentlicht. Rechtswirksam erteilt wurde das Patent am 1.8.2013. Die lange Bearbeitungsfrist ergab sich u. a. dadurch, dass in Deutschland lange Zeit die Meinung vorherrschte, dass genetische Untersuchungen am Embryo (Präimplantationsdiagnostik) nach dem Embryonenschutzgesetz (ESchG) verboten seien, was sich erst nach einem Urteil des Bundesgerichtshof im Jahre 2010 als unzutreffend erwies. Der Nachweis, dass das dargestellte Verfahren auch technisch umsetzbar ist, erfolgte im Tierversuch, nach Stammzellasservation wurde aus den Blastozysten eine gesunde Nachkommenschaft geboren. Im Artikel werden die Techniken der embryonenerhaltenden Gewinnung pluripotenter embryonaler Stammzellen beschrieben und die potenziellen Möglichkeiten einer Anwendung aufgezeigt.

### Einleitung

Stammzellen unterscheiden sich von normalen differenzierten Zellen prinzipiell durch ihr Vermögen zur unbegrenzten Teilung und das Potenzial zur Entwicklung in ganz verschiedene Zellarten mit charakteristischen Phänotypen und spezialisierten Funktionen [1]. Dieses Potenzial macht sie sehr interessant für vielfältige Anwen-

### Abstract

On August 1, 2013, the German Patent and Trademark Office issued a patent for the “Non-embryo-destructive extraction of pluripotent embryonic stem cells, stem cells obtained by this process and their uses” (DE 10 2004 062 184 B4). The patent document describes a non-embryo-destructive process to harvest embryonic stem cells from the inner cell mass (ICM) during the blastocyst development stage. The patent application was filed with the German Patent Office in Munich on December 23, 2004 and the patent claim was published in 2006. The patent was granted on August 1, 2013. Processing the patent application was a lengthy affair due to the fact that, for a long time, the prevailing opinion in Germany was that genetic screening of embryos (preimplantation genetic diagnosis) was prohibited under the German Embryo Protection Act (ESchG). A ruling by the German Federal Court in 2010 proved this opinion to be false. Animal studies have provided the evidence that the described procedure is technically feasible; healthy offspring were born after stem cells were harvested from the blastocyst and stored. We report here on a technique for the non-embryo-destructive extraction of pluripotent embryonic stem cells together with potential future applications for stem cells harvested in this manner.

dungen in der Pharmazie und Medizin. Insbesondere der Ersatz und/oder die Regeneration von zerstörtem oder unzureichend funktionierendem Gewebe eines Patienten ist hierbei ein bevorzugtes Ziel [1].

Die „klassische“ Methode der Stammzellgewinnung beruht auf der Isolierung von Stammzellen aus Präimplantationsembryonen. Sämtliche bisher etablierten Verfahren basieren jedoch auf

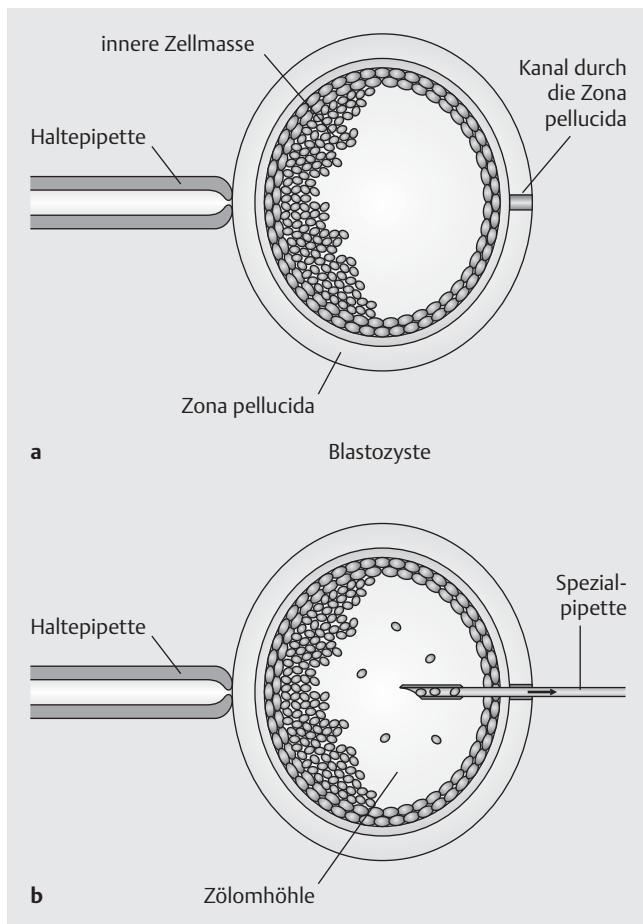

**Abb. 1 a und b** a Schematische Darstellung einer Blastozyste mit Darstellung des Kanals zum Einführen der Manipulationskapillare (aus [1]).  
b Gewinnung von mobilisierten Zellen der inneren Zellmasse mithilfe einer Spezialpipette (aus [1]).

einer Zerstörung der Embryonen [1]. Diese Techniken sind deswegen insbesondere aus ethischen Gründen umstritten, werden vielfach daher strikt abgelehnt und sind z. T. sogar strafrechtlich verboten (vgl. Deutsches Embryonenschutzgesetz).

In Anbetracht dessen stellt sich deshalb die Frage, ob es möglich ist, embryonale Stammzellen zu gewinnen, ohne die Existenz des Embryos und seiner Fähigkeit zur individuellen Menschwerdung zu gefährden. Wäre dies möglich, dann ließe sich ein gewichtiges ethisches Argument gegen die Reproduktionsmedizin grundsätzlich auf die Promotion menschlichen Lebens ausgerichtet ist, sich im Falle der Stammzellgewinnung jedoch zielgerichtet für die Zerstörung früher humaner Daseinsformen „hergibt“; dass dabei oft „verwaiste“ Präimplantationsembryonen verwendet werden, ändert dabei an den Prämissen der ethischen Diskussion wenig, da solche Embryonen genauso gut zur Spende freigegeben werden können, auch im Rahmen des Embryonenschutzgesetzes (vgl. „Netzwerk Embryonenspende“).

Darüber hinaus würde die embryonenerhaltende Stammzellgewinnung noch eine weitere, bisher unbekannte Dimension eröffnen, nämlich dahingehend, dass ein geborenes Individuum ein Depot eigener Stammzellen aus der Embryonalzeit besitzen würde. Dies ist bei der embryonendestruierenden Stammzellgewinnung naturgemäß nicht der Fall. Es lässt sich heutzutage

noch nicht abschätzen, in welchem Umfang diese Option in der Zukunft medizinische Bedeutung erlangen wird, wobei schon heute festzuhalten ist, dass eine autologe Anwendung per se günstiger ist als eine Verwendung fremder Stammzellen.

Ein Verfahren, das es erlaubt, Stammzellen aus der inneren Zellmasse (ICM) ohne Beeinträchtigung des Embryos und seines Entwicklungspotenzials zu entnehmen, könnte aber auch schon heutzutage von Bedeutung werden, nämlich im Rahmen der Präimplantationsdiagnostik (PID). Bei dieser Diagnostik setzt sich zusehends die Biopsie an Blastozysten durch (entgegen der ursprünglichen Biopsie am Mehrzeller), wobei bislang nicht ganz klar ist, welche Zellentitäten der Blastozyste die zuverlässigsten Ergebnisse liefern. Derzeit spricht einiges dafür, dass dies die ICM und nicht das Trophektoderm ist.

Im Nachfolgenden wird ein Deutsches Bundes-Patent dargestellt und kommentiert, das eine Technik beschreibt, die ermöglicht, embryonenerhaltend individuelle Stammzellen für den späteren Einsatz in der regenerativen Medizin bzw. der Reproduktionsmedizin zu gewinnen.

## Übersicht/Review

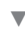

### Technik der embryonenerhaltende Gewinnung pluripotenter embryonaler Stammzellen

Die Technik der embryonenerhaltenden Gewinnung pluripotenter embryonaler Stammzellen ist im Patent (DE 10 2004 062 184 B4) detailliert beschrieben [1]. Im Kurzen wird nach der Fixierung der Blastozyste mit einer Haltekapillare (☉ **Abb. 1 a**) ein Kanal in der Zona pellucida (der äußeren Schutzhülle von Blastozysten) eröffnet (☉ **Abb. 1 a**). Die Eröffnung der Zona pellucida kann mithilfe verschiedener Verfahren, die bereits in der assistierten Reproduktionsmedizin bekannt sind. Möglich sind chemische Techniken mit z. B. saurer Tyrode-Lösung, mechanische Techniken und Lasertechniken [1]. Durch diese Öffnung wird dann ein Instrument zur Mobilisierung der Stammzellen eingeführt und durch die anschließende Schicht des Trophektoderms bis zur inneren Zellmasse geführt (☉ **Abb. 1 b**). Folgende Mobilisierungsinstrumente können zum Einsatz kommen: 1, eine Spezialpipette mit einem Durchmesser von ca. 10 µm, die an mindestens 2 Seiten einen messerartigen Aufsatz aufweist, die dadurch durch vorsichtiges Drehen der Pipette einzelne Zellen der inneren Zellmasse mobilisiert. Die Absaugung der nun von der inneren Zellmasse abgetrennten Stammzellen erfolgt entweder mit der Mobilisierungskapillare oder einer doppelumigen Kapillare (☉ **Abb. 1 b**).

Nach der Entnahme werden die Zellen in geeignetes Kulturmedium überführt und nach bekannten Verfahren zur Züchtung embryonaler Stammzellen kultiviert [1]. Im Patent sind verschiedene Kulturverfahren zur Stammzellerexpansion beschrieben. „Die Züchtung beinhaltet typischerweise die Kultivierung auf Maus-Fibroblasten-Feederzellschichten. Statt Maus-Fibroblasten können jedoch auch Feederzellen anderen Ursprungs, z. B. Primatenzellen, verwendet werden. In einer Ausführungsform beinhaltet das Kultivierungsverfahren das Ausplattieren der gewonnenen Zellen auf einer Maus-Fibroblastenschicht, wobei Zellansammlungen gebildet werden, das Entfernen der Zellansammlungen und das Dissoziieren der Zellansammlungen zu dissoziierten Zellen und erneutes Ausplattieren auf Fibroblasten-Feederzellschichten. Ein bevorzugtes Medium für die Kultivierung embryonaler Stammzellen ist das in WO 96/22362 beschriebene ‚ES‘-Medium, welches aus 80% DMEM (Dulbeccos Modified Eagle’s Me-

dium), 20% fötalem Kalbserum (FBS), 0,1 mM  $\beta$ -Mercaptoethanol und ggf. kleinen Mengen weiterer Additive, z.B. Aminosäuren, Antibiotika etc., besteht. Es können jedoch auch andere im Stand der Technik bekannte geeignete Medien eingesetzt werden [1].“

### Embryonenerhaltende Stammzellgewinnung

Übliche bzw. gut etablierte Verfahren zur Gewinnung humaner embryonaler Stammzellen (hESC) basieren – nach der Erstpublikation von Evans und Kaufmann [2] – auf einer Destruktion humaner Embryonen [3–7], sei es nun im frühen Furchungsstadium oder auf der Entwicklungsstufe einer Blastozyste [3,8,9]. Verwendet werden hierzu meist „überzählige“ Embryonen, wie sie bei ART-Behandlungen anfallen können [5,10,11], gelegentlich auch solche mit genetischen Auffälligkeiten (nach PGS [präimplantatives genetisches Screening]), die nicht zum Embryotransfer (ET) kommen [11,12]. Diese Vorgehensweise ist in vielen Ländern – jedoch nicht in Deutschland – gesetzlich möglich, wenn auch nicht ethisch unumstritten [13,14] – sieht man einmal von der Verwendung entwicklungsarretierter Embryonen ab [6,15]. Auf alle Fälle besteht in mehreren Ländern keine generelle gesetzliche Notwendigkeit, embryonale Stammzellen ohne Zerstörung der Embryonen zu gewinnen.

In den Jahren 2006 bis 2008 erschienen von der Arbeitsgruppe um Lanza mehrere Veröffentlichungen, welche die embryonenerhaltende Gewinnung von Stammzellen aus frühen Furchungsstadien beschreiben [16–19]. Es ist schon lange bekannt, dass derart gewonnene, einzelne Blastomeren tatsächlich das Potenzial besitzen, sich zu Geweben oder Organen zu entwickeln [20,21], wengleich bereits im 2-Zell-Stadium eine gewisse Präferenz zum Trophoblasten bzw. zur inneren Zellmasse (ICM) hin besteht [8]. Die Etablierung von Stammzelllinien aus Biopsien früher Furchungsstadien wurde mittlerweile auch von anderen Gruppen gezeigt [15,22–24].

Die Verwendung von ICM-Zellen, also von Blastozysten, ist schwieriger [17,24,25], was im Wesentlichen damit zusammenhängt, dass bei Blastozysten bereits eine zelluläre Polarisation vorliegt [26], nämlich in polarisiertes Trophektoderm-Gewebe und unpolarierte ICM. Dieses Problem lässt sich aber durch Hinzugabe von Laminin gut lösen, sodass die Effizienz dieser Technik zur Stammzellgewinnung an die der anderen Techniken heranreicht [17,27,28].

Das vorliegende Patent beschreibt ein Verfahren zur embryonenerhaltenden Gewinnung embryonaler Stammzellen aus der inneren Zellmasse (ICM) im Entwicklungsstadium der Blastozyste [1]. Es wurde 23.12.2004 beim Deutschen Patentamt in München angemeldet und 2006 als Patentanspruch offengelegt, also veröffentlicht. Rechtswirksam erteilt wurde das Patent am 1.8.2013. Die lange Bearbeitungsfrist ergab sich u.a. dadurch, dass in Deutschland lange Zeit die Meinung vorherrschte, dass genetische Untersuchungen am Embryo (Präimplantationsdiagnostik [PID], PGS) nach dem Embryonenschutzgesetz (ESchG) verboten seien, was sich erst nach einem Urteil des Bundesgerichtshof im Jahre 2010 als unzutreffend erwies [29]. Der Nachweis, dass das dargestellte Verfahren auch technisch umsetzbar ist, erfolgte von uns im Tierversuch [30], nach Stammzellasservation wurde aus den Blastozysten eine gesunde Nachkommenschaft geboren.

### Asservierung embryonaler Stammzellen zur homologen Verwendung

Das dargestellte Verfahren erlaubt es – aus reproduktionsmedizinischer Sicht –, dass im Rahmen von ART-Behandlungen zukünftig embryonale Stammzellen asserviert werden. Die biopsierten

Stammzellen können dann sofort weiter kultiviert (expandiert) und dann kryokonserviert werden. Möglich ist auch eine sofortige Kryokonservierung mit z.B. einer Asservation der Blastomeren in geeigneten Lagergefäßen (z.B. auf Trägern für die Vitrifikation oder in einer leeren Zona pellucida). Ziel wäre die spätere Verwendung dieser Stammzellen für das Kind, das explizit aus der biopsierten Blastozyste hervorgegangen ist.

Zweifellos würden solche frühen Stammzellen das größte Entwicklungspotenzial besitzen, größer als fetale oder gar adulte [31,32]. Da sie zudem HLA-identisch sind, sind keine immunpathologischen Reaktionen zu befürchten wie bei heterologen Stammzellen [33,34]. Für den Fall, dass nach Asservation von ICM-Stammzellen der Transfer einer Blastozyste nicht zu einer Schwangerschaft mit Geburt eines Kindes führt, bestünde auch weiterhin die Möglichkeit der allogenen Verwendung.

### Die Biopsie der inneren Zellmasse (ICM) zur PID scheint zuverlässigere Ergebnisse zu erbringen

Aktuell wurden verschiedene Studien zur Trophektodermbiopsie (TEB), also einer Technik der PID bzw. PGS, publiziert, die einige Fragen aufwerfen [35–37]. Die Autoren untersuchten nämlich bei einer Blastozyste gleichzeitig das Trophektoderm, die Blastocoel Flüssigkeit und die innere Zellmasse und kamen zu dem Ergebnis, dass die genetischen Befunde dort jeweils unterschiedlich sein können: offensichtlich ist es möglich, dass auffällige genetische Befunde bei den Trophektodermzellen und auch in der Blastocoel Flüssigkeit vorliegen, während die Genetik der ICM unauffällig ist. Diskutiert wird derzeit, dass genetisch auffällige Zellen der ICM in das Blastocoel und/oder das Trophektoderm „entsorgt“ werden, im Sinne einer „embryonalen Selbstreparatur“ [38]. Sollte sich das bestätigen, dann hätte dies zur Konsequenz, dass zwar unauffällige genetische Befunde nach TEB verlässlich sind, bei auffälligen Befunden dagegen durchaus ein genetisch unauffälliger Embryoblast vorliegen könnte. Damit wäre – zumindest in dieser Konstellation – die TEB als Technik der PID/PGS zu hinterfragen und der direkten Biopsie der ICM (ICM-B) der Vorzug zu geben. Und hier wäre die im Patent beschriebene Technik eine Möglichkeit.

Die letzte Anwendungsmöglichkeit zielt mehr auf die Zukunft.

### Präimplantationstherapie (PIT)

Ein Hauptkritikpunkt an der PID bzw. PGS ist die Tatsache, dass diese Untersuchungsmethoden in letzter Konsequenz zu einer Verwerfung genetisch auffälliger Embryonen führen, also zu einer Negativselektion. Insbesondere bei monogenen Erkrankungen verfolgen diese Diagnosetechniken keinerlei kurativen Ansatz, die abschließliche Erkennung von genetischen Veränderungen ist das Ziel, nicht ihre Behebung. Die patentierte Technik bietet hingegen die Option einer „präimplantativen Therapie“ (PIT). Die PIT ist allerdings ein Vorgriff auf die Zukunft, da die genetische Korrektur von z.B. monogenen Veränderungen bislang nicht routinemäßig etabliert ist. Allerdings sind im Tierexperiment schon heute Techniken beschrieben, die in diese Richtung zielen [39–41], auch die Möglichkeit, eine humane Trisomie 21 so zu korrigieren, wurde vom Prinzip her schon dargestellt [42–44]. Sollte die Möglichkeit derartiger Korrekturen einmal tatsächlich etabliert sein, dann wäre es sinnvoll, diese so früh wie möglich vorzunehmen [45]. Um einen kurativen Ansatz zu verfolgen wäre es – nach derzeitigem Kenntnisstand – nicht einmal erforderlich, sämtliche Zellen der ICM einer Korrektur zu unterziehen, oft dürfte die Etablierung eines Mosaiks, evtl. auf der Basis einer Reprogrammierung, ausreichen [46], um die spätere kli-



nische Manifestation der damit verbundenen Erkrankung zu verhindern. Ähnliches dürfte auch für Mitochondriopathien gelten.

## Schlussfolgerung

Die im Patent dargestellte Methode ermöglicht es, pluripotente Stammzellen aus der inneren Zellmasse eines Embryos zu gewinnen, ohne dessen Existenz oder dessen Entwicklungspotenzials zu beeinträchtigen. Dieser Umstand hat nicht nur einen technischen Aspekt, indem also eine neue und damit zusätzliche Methode zur Stammzellgewinnung beschrieben wird, sondern weitere, v.a. ethische Aspekte, aber auch solche für die derzeitige Praxis der Reproduktionsmedizin und solche, die in die Zukunft weisen. So nimmt eine embryonenerhaltende Stammzellgewinnung der ethischen Diskussion wesentliche Argumente, die bei einer embryonendestruierenden Gewinnung vorherrschen. Für die aktuelle Praxis der Reproduktionsmedizin könnte die Methode schon rasch an Bedeutung gewinnen, v.a. wenn es sich bestätigen sollte, dass die PID an Zellen des Trophektoderms in nennenswerten Umfang falsche pathologische Resultate liefern sollte, die Biopsie der ICM hingegen nicht. In die Zukunft weisen hingegen die Optionen, dass durch diese (und vergleichbare) Techniken eine präimplantative Therapie (PIT) an Präimplantationsembryonen denkbar wird bzw. dass geborene Individuen im Falle einer Erkrankung auf ihr eigenes embryonales Stammzelldepot z.B. zur Reparatur von Organdefekten zurückgreifen können.

## Interessenkonflikt

R.D. und M.W.B. erklären, dass kein Interessenkonflikt besteht. W.W. erklärt, dass er Patenhalter des Patents „DE 10 2004 062 184 B4“ ist.

## Literatur

- 1 DPMAregister. DE 10 2004 062 184.5. Online: <https://register.dpma.de/DPMAregister/pat/register?AKZ=1020040621845>; Stand: 20.04.2015
- 2 Evans MJ, Kaufmann MH. Establishment in culture of pluripotential cells from mouse embryo. *Nature* 1981; 292: 154–156
- 3 Thomson JA, Itskovitz-Eldor J, Shapiro SS et al. Embryonic stem cell lines derived from human blastocysts. *Science* 1998; 282: 1145–1147
- 4 Heins N, Englund MC, Sjöblom C et al. Derivation, characterization, and differentiation of human embryonic stem cells. *Stem Cells* 2004; 22: 367–376
- 5 Mateizel I, De Temmerman N, Ullmann U et al. Derivation of human embryonic stem cell lines from embryos obtained after IVF and PGD for monogenic disorders. *Mol Hum Reprod* 2006; 21: 503–511
- 6 Zhang X, Stoikovic P, Przyborski S et al. Derivation of human embryonic stem cells from developing and arrested embryos. *Stem Cells* 2006; 24: 2669–2676
- 7 Amit M, Itskovitz-Eldor J. Sources, derivation and culture of human embryonic stem cells. *Semin Reprod Med* 2006; 24: 298–303
- 8 Piotrowska K, Wianny F, Pedersen RA et al. Blastomeres arising from the first cleavage division have distinguishable fates in normal mouse development. *Development* 2001; 128: 3739–3748
- 9 Smith AG. Embryo-derived stem cells: of mice and men. *Annu Rev Cell Dev Biol* 2001; 17: 435–462
- 10 Pickering SJ, Braude PR, Burns CJ et al. Preimplantation genetic diagnosis as a novel source of embryos for stem cell research. *Reprod Biomed Online* 2003; 7: 353–364
- 11 Cowan CA, Klimanskaya I, McMahon MS et al. Derivation of embryonic stem-cell lines from human blastocysts. *N Engl J Med* 2004; 350: 1353–1356
- 12 Verlinsky Y, Streichenko N, Kukharensko V et al. Human embryonic stem cell lines with genetic disorders. *Reprod Biomed Online* 2005; 10: 105–110

- 13 Hug K. Sources of human embryos for stem cell research: ethical problems and their possible solutions. *Medicina (Kaunas)* 2005; 41: 1002–1010
- 14 Evans M. Ethical sourcing of human embryonic stem cells – rational solutions? *Nat Rev Mol Cell Biol* 2005; 6: 663–667
- 15 Feki A, Bosman A, Dubuisson JB et al. Derivation of the first Swiss human embryonic stem cell line from a single blastomere of an arrested four-cell stage embryo. *Swiss Med Wkly* 2008; 138: 540–550
- 16 Chung Y, Klimanskaya I, Becker S et al. Embryonic and extraembryonic stem cell lines derived from single mouse blastomeres. *Nature* 2006; 439: 216–219
- 17 Klimanskaya I, Chung Y, Becker S et al. Human embryonic stem cell lines derived from single blastomeres. *Nature* 2006; 444: 481–485
- 18 Klimanskaya I, Chung Y, Becker S et al. Derivation of human embryonic stem cells from single blastomeres. *Nat Protoc* 2007; 2: 1963–1972
- 19 Chung Y, Klimanskaya I, Becker S et al. Human embryonic stem cell lines generated without embryo destruction. *Cell Stem Cell* 2008; 2: 113–117
- 20 Kelly SJ. Studies of the developmental potential of 4- and 8-cell stage blastomeres. *J Exp Zool* 1977; 200: 365–376
- 21 Pedersen RA. Potency, Lineage and Allocation in Preimplantation Mouse Embryos. In: Rossant J, Pedersen RA, eds. *Experimental Approaches to mammalian embryonic Development*. New York, USA: Cambridge University Press; 1986: 3–33
- 22 Geens M, Mateizel I, Sermon K et al. Human embryonic stem cell lines derived from single blastomeres of two 4-cell stage embryos. *Hum Reprod* 2009; 24: 2709–2717
- 23 Giritharan G, Ilic D, Gormley M et al. Human embryonic stem cells derived from embryos at different stages of development share similar transcription profiles. *PLoS ONE* 2011; 6: e26570
- 24 Cenariu M, Pall E, Cernea C et al. Evaluation of bovine embryo biopsy techniques according to their ability to preserve embryo viability. *J Biomed Biotech* 2012; DOI: 10.1155/2012/541384
- 25 Fong CY, Richards M, Bongso A. Unsuccessful derivation of human embryonic stem cell lines from pairs of human blastomeres. *Reprod Biomed Online* 2006; 13: 295–300
- 26 Johnson MH, McConell JM. Lineage allocation and cell polarity during mouse embryogenesis. *Semin Cell Dev Biol* 2004; 15: 573–581
- 27 Ilic D, Giritharan G, Zdravkovic T et al. Derivation of human embryonic stem cell lines from biopsied blastomeres on human feeders with minimal exposure to xenomaterials. *Stem Cell Dev* 2009; 18: 1343–1350
- 28 Klimanskaya I. Embryonic stem cells from blastomeres maintaining embryo viability. *Semin Reprod Med* 2013; 31: 49–55
- 29 Bundesgerichtshof, 5. Strafsenat. Urteil vom 6. Juli 2010: 5 StR 386/09
- 30 Dittrich R, Lotz L, Würfel W et al. Offspring after embryo-preserving biopsy of the embryoblast with standard ICSI equipment in mouse blastocysts. *In Vivo* 2011; 25: 935–939
- 31 Bianco P, Robey PG, Simmons PJ. Mesenchymal stem cells: revisiting history, concepts, and assays. *Cell Stem Cell* 2008; 4: 313–319
- 32 Snykers S, De Kock J, Rogiers V et al. In vitro differentiation of embryonic and adult stem cells into hepatocytes: state of the art. *Stem Cells* 2009; 27: 577–605
- 33 Gyurkocza B, Rezvani A, Storb RF. Allogeneic hematopoietic cell transplantation: the state of the art. *Exp Rev Hematol* 2010; 3: 285–299
- 34 Farge D, Labopin M, Tyndall A et al. Autologous hematopoietic stem cell transplantation for autoimmune diseases: an observational study on 12 years' experience from the European Group for Blood and Marrow Transplantation Working Party on Autoimmune Disease. *Haematologica* 2010; 95: 284–292
- 35 Tobler KJ, Zhao Y, Ross R et al. Comparative genomic hybridization microarray (aCGH) analysis of DNA isolated from blastocoels fluid from 26 blastocysts. *Fertil Steril* 2014; 101 (Suppl.): e4
- 36 Tobler KJ, Zhao Y, Ross R et al. Blastocoel (BF) harbours embryonic DNA that may result from the marginalization of aneuploid cells during embryogenesis. *Fertil Steril* 2014; 102 (Suppl.): e205
- 37 Tobler KJ, Zhao Y, Ross R et al. The potential use of blastocoels fluid (BF) from expanded blastocysts as a less invasive form of embryo biopsy for preimplantation genetic testing. *Fertil Steril* 2014; 102 (Suppl.): e183–e184
- 38 Würfel W. Der frühe Embryo – Netzwerke autologer, maternalen und iatrogenen Regulation. *Gynäkologische Endokrinologie* 2015; 13: 92–97
- 39 Polzin VJ, Anderson DL, Anderson GB et al. Production of sheep-goat chimeras by inner cell mass transplantation. *J Animal Sci* 1987; 65: 325–330

- 40 Zheng YL, Jiang MX, OuYang YC et al. Production of mouse by inter-strain inner cell mass replacement. *Zygote* 2005; 13: 73–77
- 41 Murakami M, Ferguson CE, Perez O et al. Transfer of inner cell mass cells derived from bovine nuclear transfer embryos into the trophoblast of bovine in vitro-produced embryos. *Cloning Stem Cells* 2006; 8: 51–60
- 42 Li BL, Chang KH, Wang PR et al. Trisomy correction in Down syndrome induced pluripotent stem cells. *Cell Stem Cell* 2012; 5: 615–619
- 43 Jiang J, Jing Y, Cost GJ et al. Translation dosage compensation to trisomy 21. *Nature* 2013; 500: 296–300
- 44 Disteche CM. How to correct chromosomal trisomy. *Cell Res* 2013; 23: 1345–1346
- 45 Kay MA. State-of-the art gene based therapies: the road ahead. *Nature Rev Genet* 2011; 12: 316–328
- 46 Mikkers HM, Freund C, Mummery CL et al. Cell replacement therapies: is it time to reprogram? *Hum Gene Ther* 2014; 25: 866–874
